# Supplementary material for: Tailoring the fusion effect of phase-engineered 1T/2H-MoS2 towards photocatalytic hydrogen evolution
Source: Royal Society of Chemistry journal article supplement (doi:10.1039/d2nj01694j), 2022-01-01
Supplement: d2nj01694j1.pdf [file d2nj01694j1.pdf]

SUPPORTING INFORMATION

**Tailoring the fusion effect of phase engineered 1T/2H-MoS<sub>2</sub>  
towards photocatalytic hydrogen evolution**

Sarmistha Das, Gayatri Swain, Bhagyashree Priyadarshini Mishra and Kulamani Parida\*

*<sup>a</sup>Centre for Nanoscience and Nanotechnology, Siksha 'O' Anusandhan (Deemed to be University), Bhubaneswar-751030, Odisha, India*

*\*Corresponding author*

---

---

**\*Corresponding Author's Email:**

*Kulamaniparida@soa.ac.in*

*paridakulamani@yahoo.com*

Tel. No.: +91-674-2351777 and Fax. +91-674-2350642

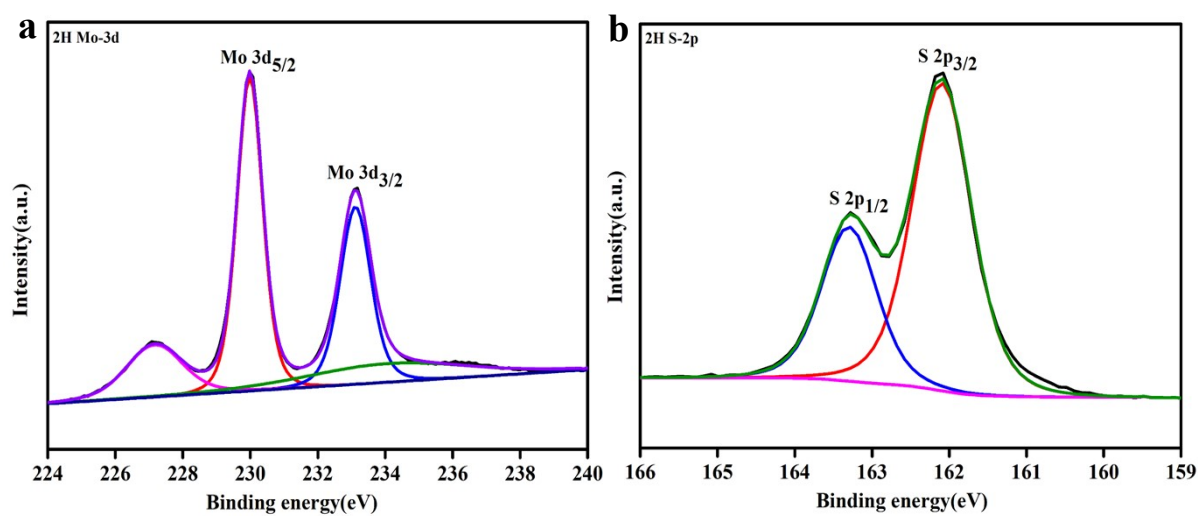

Figure S1. XPS plot for 2H-MoS<sub>2</sub> (a) Mo 3d (b) S 2p.

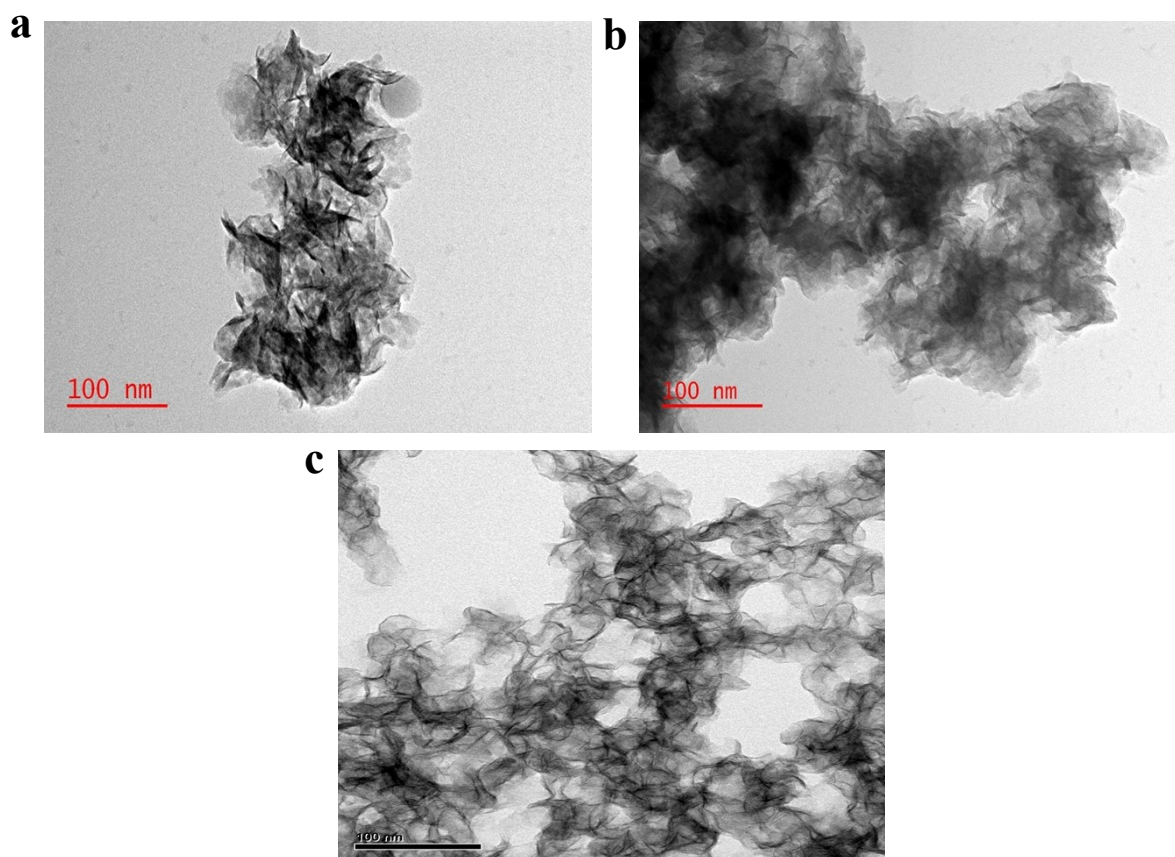

Figure S2. HRTEM images of prepared (a) 15-1T/2H-MoS<sub>2</sub> (b) 45-1T/2H-MoS<sub>2</sub> (c) 2H-MoS<sub>2</sub>

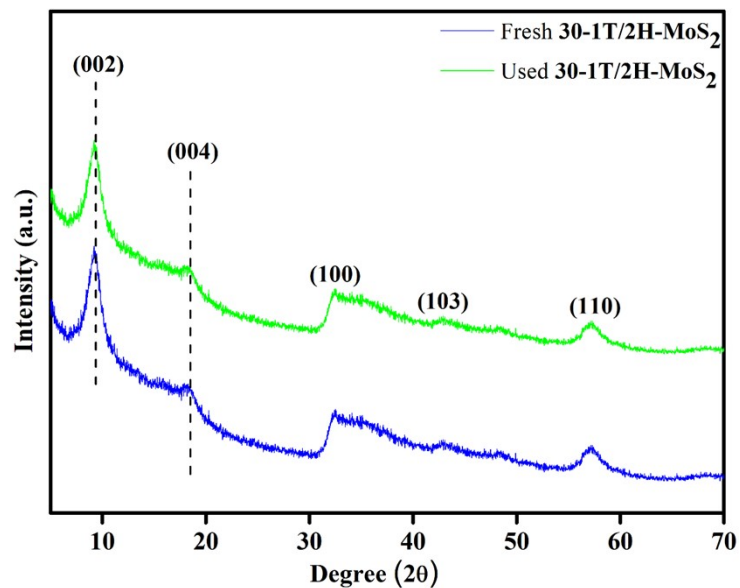

**Figure S3.** XRD plot comparing fresh and used 30-1T/2H-MoS<sub>2</sub>.

**Table S1 (Comparison of present work with other benchmark photocatalysts for H<sub>2</sub> evolution)**

| Sl. No. | Photocatalyst                   | Synthetic procedure      | Irradiation Light source | H <sub>2</sub> production Rate (μmol/h) | Reference    |
|---------|---------------------------------|--------------------------|--------------------------|-----------------------------------------|--------------|
| 1       | CeO <sub>2</sub>                | Solvothermal             | 3 W UV-LED               | 3.7                                     | 1            |
| 2       | g-C <sub>3</sub> N <sub>4</sub> | Thermal polycondensation | 300 W Xe lamp            | 1.8                                     | 2            |
| 3       | MnO <sub>2</sub>                | Solvothermal             | 300 W Xe lamp            | 0.95                                    | 3            |
| 4       | CoAl LDH                        | Solvothermal             | 300 W Xe lamp            | 1.64                                    | 4            |
| 5       | TiO <sub>2</sub>                | One step Hydrothermal    | 300 W Xe lamp            | 0.3                                     | 5            |
| 6       | ZnO                             | Chemical deposition      | 300 W Xe lamp            | 0.9                                     | 6            |
| 7       | CdS                             | Solvothermal             | 300 W Xe lamp            | 66.9                                    | 6            |
| 8       | ZnS                             | Hydrothermal             | 250 W QTH lamp           | 29.4                                    | 7            |
| 9       | 2H-MoS <sub>2</sub>             | Hydrothermal             | 150 W Xe lamp            | 8.5                                     | Current work |
| 10      | 1T/2H-MoS <sub>2</sub>          | Hydrothermal             | 150 W Xe lamp            | 142.7                                   | Current work |

## REFERENCE:

1. Zhu, C.; Wang, Y.; Jiang, Z.; Xu, F.; Xian, Q.; Sun, C.; Tong, Q.; Zou, W.; Duan, X.; Wang, S. CeO<sub>2</sub> nanocrystal-modified layered MoS<sub>2</sub>/g-C<sub>3</sub>N<sub>4</sub> as 0D/2D ternary composite for visible-light photocatalytic hydrogen evolution: Interfacial consecutive multi-step electron transfer and enhanced H<sub>2</sub>O reactant adsorption. *Appl. Catal. B: Environ.*, **2019**, *259*, 118072.
2. Li, C.; Wu, H.; Hong, S.; Wang, Y.; Song, N.; Han, Z.; Dong, H. 0D/2D heterojunction constructed by high-dispersity Mo-doped Ni<sub>2</sub>P nanodots supported on g-C<sub>3</sub>N<sub>4</sub> nanosheets towards enhanced photocatalytic H<sub>2</sub> evolution activity. *Int. J. Hydrog. Energy*, **2020**, *45*(43), 22556-22566.
3. Wang, X.; Sun, K.; Gu, S.; Zhang, Y.; Wu, D.; Zhou, X.; Gao, K.; Ding, Y. Construction of a novel electron transfer pathway by modifying ZnIn<sub>2</sub>S<sub>4</sub> with  $\alpha$ -MnO<sub>2</sub> and Ag for promoting solar H<sub>2</sub> generation. *Appl. Surf. Sci.*, **2021**, *549*, 149341.
4. Zhang, J.; Zhu, Q.; Wang, L.; Nasir, M.; Cho, S.H.; Zhang, J. g-C<sub>3</sub>N<sub>4</sub>/CoAl-LDH 2D/2D hybrid heterojunction for boosting photocatalytic hydrogen evolution. *Int. J. Hydrog. Energy*, **2020**, *45*(41), 21331-21340.
5. Min, S.; Hou, J.; Lei, Y.; Ma, X.; Lu, G. Facile one-step hydrothermal synthesis toward strongly coupled TiO<sub>2</sub>/graphene quantum dots photocatalysts for efficient hydrogen evolution. *Appl. Surf. Sci.*, **2017**, *396*, 1375-1382.
6. Sun, G.; Xiao, B.; Zheng, H.; Shi, J.W.; Mao, S.; He, C.; Li, Z.; Cheng, Y. Ascorbic acid functionalized CdS–ZnO core–shell nanorods with hydrogen spillover for greatly enhanced photocatalytic H<sub>2</sub> evolution and outstanding photostability. *J. Mater. Chem. A*, **2021**, *9*(15), 9735-9744.
7. Rameshbabu, R.; Ravi, P.; Pecchi, G.; Delgado, E.J.; Mangalaraja, R.V.; Sathish, M. Black Trumpet Mushroom-like ZnS incorporated with Cu<sub>3</sub>P: Noble metal free photocatalyst for superior photocatalytic H<sub>2</sub> production. *J. Colloid Interface Sci.*, **2021**, *590*, 82-93.
